# Supplementary material for: ROCK inhibitors enhance the production of large lipid-enriched 3D organoids of 3T3-L1 cells
Source: PubMed Central journal article supplement (PMC7943807; doi:10.1038/s41598-021-84955-7), 2021-03-09
Supplement: 41598_2021_84955_MOESM1_ESM.pdf [file 41598_2021_84955_MOESM1_ESM.pdf]

ROCK inhibitors enhance the production of large lipid-enriched 3D organoids of 3T3-L1 cells

**Key words:** deepening of the upper eyelid sulcus (DUES), 3T3-L1 cell, ROCK, Rho-kinase, ROCK inhibitor, 3-dimension (3D) tissue culture

**Yosuke Ida, Fumihito Hikage, Hiroshi Ohguro.**

Departments of Ophthalmology, Sapporo Medical University School of Medicine

All correspondence should be addressed to Fumihito Hikage

Tel# 81-11-611-2111, Fax# 81-11-613-6575, e-mail: [fuhika@gmail.com](mailto:fuhika@gmail.com)

Both authors (Y. I and F. H.) contributed equally to this manuscript.

| Gene                           | Forward primer (5' to 3') | Reverse primer (5' to 3') | TaqMan probe (5' to 3')                         |
|--------------------------------|---------------------------|---------------------------|-------------------------------------------------|
| <b>Mouse</b>                   |                           |                           |                                                 |
| <i>Ppar<math>\gamma</math></i> | CTGCTCCACACTATGAAGACAT    | TGCAGGTTCTACTTTGATCGC     | /FAM/AGCTGACCC/ZEN/AATGGTTGCTGATTACA/IABkFQ/    |
| <i>Cebpa</i>                   | ACAAGAACAGCAACGAGTACC     | TCATTGTCCTGCTCAACTCC      | /FAM/CGCAAGAGC/ZEN/CGAGATAAAGCCAAAC/IABkFQ/     |
| <i>Ap2</i>                     | AAATCACCGCAGACGACAG       | CCTTTCATAACACATTCCACCAC   | /FAM/ TGAAGAGCA/ZEN/TCATAACCCCTAGATGGCG/IABkFQ/ |
| <i>Leptin</i>                  | GTGCCTATCCAGAAAGTCCAG     | AATGAAGTCCAAGCCAGTGA      | /FAM/ACCGACTGC/ZEN/GTGTGTGAAATGTCA/IABkFQ/      |
| <i>Col1a1</i>                  | CGCAAAGAGTCTACATGTCTAGG   | CATTGTGTATGCAGCTGACTTC    | /FAM/CCGGAGGTC/ZEN/CACAAAGCTGAACA/IABkFQ/       |
| <i>Col4a1</i>                  | TCTGGCTGTGGAAAATGTGA      | AATCCAATGACACCTTGCAAC     | /FAM/TCTTCTCC/ZEN/CTTTGTCCCTTCACGC/IABkFQ/      |
| <i>Col6a1</i>                  | CCAGATGAGTGTGAGATCCTG     | AAGTTCTGTAGGCCAATGCTC     | /FAM/ACCCATTGA/ZEN/CATCCTCTTCGTGCTG/IABkFQ/     |
| <i>Fn1</i>                     | GAGCTATCCATTTACCTTCAGA    | TTGTTTCGTAGACACTGGAGA     | /FAM/CAGGAGATT/ZEN/TGTTAGGACCACGGCA/IABkFQ/     |
| <i>36b4</i>                    | TTATAACCCCTGAAGTGCTCGAC   | CGCTTGTAACCCATTGATGATG    | /FAM/AGGCCCTGC/ZEN/ACTCTCGCTT/IABkFQ/           |

## Supplementary Table 1

Sequences of primers and Taqman probes are shown.
